1 **Title:** Study Pre-protocol for “BronchStart - The Impact of the COVID-19 Pandemic on the  
2 Timing, Age and Severity of Respiratory Syncytial Virus (RSV) Emergency Presentations; a  
3 Multi-Centre Prospective Observational Cohort Study”

4 **Authors:** Thomas C. Williams<sup>1\*</sup>, Mark D Lyttle<sup>2,3</sup>, Steve Cunningham<sup>4,5</sup>, Ian Sinha<sup>6,7</sup>, Olivia  
5 Swann<sup>8,9</sup>, Abigail Maxwell-Hodkinson<sup>10</sup> & Damian Roland<sup>11,12</sup> on behalf of the Paediatric  
6 Emergency Research in the UK and Ireland (PERUKI)<sup>13</sup>

7 **Affiliations:** <sup>1</sup>Institute of Genetics and Cancer, University of Edinburgh, Edinburgh, UK;  
8 <sup>2</sup>Faculty of Health and Applied Sciences, University of the West of England, Bristol, UK;  
9 <sup>3</sup>Emergency Department, Bristol Royal Hospital for Children, Bristol, UK; <sup>4</sup>Department of  
10 Paediatric Respiratory and Sleep Medicine, Royal Hospital for Children and Young People,  
11 Edinburgh, UK; <sup>5</sup> Centre for Inflammation Research, University of Edinburgh, Edinburgh,  
12 UK; <sup>6</sup>University of Liverpool, UK; <sup>7</sup>Alder Hey Children's Hospital, Liverpool, UK;  
13 <sup>8</sup>Department of Child Life and Health, University of Edinburgh, Edinburgh, UK;  
14 <sup>9</sup>Department of Paediatric Infectious Diseases and Immunology, Royal Hospital for Children,  
15 Glasgow, UK; <sup>10</sup>University of Liverpool Medical School, Liverpool, UK; <sup>11</sup>Paediatric  
16 Emergency Medicine Leicester Academic (PEMLA) Group, Leicester Royal Infirmary,  
17 Leicester, UK, <sup>12</sup>Sapphire Group, Health Sciences, University of Leicester, Leicester, UK;  
18 <sup>13</sup>PERUKI Site Leads are listed in Supplementary File 1.

19 **\*Corresponding Author:** Thomas C Williams, Institute of Genetics and Cancer, University  
20 of Edinburgh, Crewe Road South EH4 2XU [Thomas.Christie.Williams@ed.ac.uk]

21 **Protocol Version: 1**

22

23

24 **Abstract**

25 **Background**

26 Bronchiolitis (most frequently caused by Respiratory Syncytial Virus; RSV) is a common  
27 winter disease predominantly affecting children under one year of age. It is a common reason  
28 for presentations to an Emergency Department (ED) and frequently results in hospital  
29 admission, contributing to paediatric units approaching or exceeding capacity each winter.  
30 During the SARS-CoV-2 pandemic, the circulation of RSV was dramatically reduced in the  
31 United Kingdom and Ireland. Evidence from the Southern Hemisphere and other European  
32 countries suggests that as social distancing restrictions for SARS-CoV-2 are relaxed, RSV  
33 infection returns, causing delayed or even summer epidemics, with different age distributions.

34 **Study question**

35 The ability to track, anticipate and respond to a surge in RSV cases is critical for planning  
36 acute care delivery. There is an urgent need to understand the onset of RSV spread at the  
37 earliest opportunity. This will influence service planning, to inform clinicians whether the  
38 population at risk is a wider age range than normal, and whether there are changes in disease  
39 severity. This information is also needed to inform decision on the timing of passive  
40 immunisation of children at higher risk of hospitalisation, intensive care admission or death  
41 with RSV infection, which is a public health priority.

42 **Methods and likely impact**

43 This multi-centre prospective observational cohort study will use a well-established research  
44 network (Paediatric Emergency Research in the UK and Ireland, PERUKI) to report in real  
45 time cases of RSV infection in children aged under two years, through the collection of  
46 essential, but non-identifying patient information. Forty centres will gather initial data on age,  
47 index of multiple deprivation quintile, clinical features on presentation, and co-morbidities.  
48 Each case will be followed up at 7 days to identify treatment, viral diagnosis and outcome.  
49 Information be released on a weekly basis and used to support clinical decision making.

50 **Keywords**

51 COVID-19; Respiratory Syncytial Virus; Bronchiolitis; Infants; Children; Palivizumab

52

53 **Main body**

54 ***Introduction***

55 Non-pharmaceutical interventions (NPIs) implemented to slow or eliminate the spread of  
56 SARS-CoV-2 have also had dramatic off-target consequences on transmission of other  
57 respiratory viruses, in particular Respiratory Syncytial Virus (RSV) in children. RSV  
58 infection can cause a clinical syndrome termed bronchiolitis, most commonly in infants under  
59 one year of age, and lower respiratory infection associated with wheeze in older children,  
60 typically under two years of age. In a typical year in England, RSV bronchiolitis causes  
61 significant morbidity, leading to an estimated 36,028 annual admissions for RSV, mainly in  
62 infants under 1 year of age;<sup>1</sup> every year 0.1% of all infants under 1 are admitted to paediatric  
63 intensive care units (PICUs) with a diagnosis of bronchiolitis.<sup>2</sup> In the years preceding  
64 2020/21, RSV infections in the United Kingdom and Ireland saw consistent seasonal peaks in  
65 infection and hospitalisation, with cases generally starting to rise in September, peaking in  
66 November/December, and falling to summer levels by April.<sup>1</sup> As such, when lockdown  
67 measures were implemented during the early spring of 2020, the RSV season was already in  
68 recession in the Northern hemisphere and no clear impact was seen on RSV disease burden.  
69 However, in the corresponding Southern Hemisphere winter of 2020, the NPIs led to  
70 dramatically reduced cases and admissions of paediatric RSV and influenza in Australia,<sup>3</sup>  
71 New Zealand,<sup>4</sup> Chile and South Africa.<sup>5</sup> An associated reduced rate of admissions to  
72 Paediatric Intensive Care Unit (PICU) across South America, mainly driven by a reduction in  
73 respiratory diagnoses, was also observed.<sup>6</sup>

74

75 Hierarchical variance of NPIs over time have interrupted transmission of some, but not all,  
76 respiratory viruses.<sup>7</sup> In the United Kingdom, test positivity for RSV in the Respiratory  
77 DataMart system has remained at less than 1% throughout the winter of 2020/21 (last data 11  
78 April 2021).<sup>8</sup> Conversely, rhinovirus infections continued throughout the Southern and  
79 Northern Hemisphere winter seasons.<sup>8,9</sup> A typical annual spike in rhinovirus infections in  
80 children was observed with the return to schools in England in September 2020,<sup>8</sup> and PICUs  
81 saw ongoing admissions for rhinovirus induced wheeze and bronchiolitis in the  
82 autumn/winter of 2020 despite lockdown measures [NHS Lothian data, unpublished].

83

84 Both observational and modelling studies suggest that RSV will arise out of season in the  
85 Northern hemisphere and may have a greater clinical impact.<sup>10</sup> Four Australian states, which

86 after an initial lockdown imposed few physical distancing measures with re-opened schools,  
87 have now experienced delayed annual RSV epidemic peaks. The delayed peak in Western  
88 Australia, where infections rates surged during local Spring-Summer (September-December),  
89 was associated with even higher case rates than normally seen during winter, despite no  
90 change in testing practices.<sup>11</sup> Some European countries such as France have already seen  
91 evidence of a delayed RSV season, with all French regions now having reported bronchiolitis  
92 case rates at epidemic levels.<sup>12</sup>

93

94 From a clinical perspective, it is not possible to distinguish the viral aetiology of lower  
95 respiratory tract infection, with the exception of greater probability by season of infection.  
96 With the uncoupling of RSV and seasonality observed as an impact of NPIs, there is an  
97 urgent requirement to track RSV infection for season onset and to observe the impact on a  
98 larger unexposed at risk population. It is likely that when RSV returns to the United  
99 Kingdom and Ireland in 2021 it will not follow its usual predictable seasonal pattern,  
100 particularly if lockdown measures are relaxed rapidly as SARS-CoV-2 immunisation  
101 coverage increases. Reasons why RSV might display unusual disease dynamics include a  
102 lack of circulation in the general population leading to a reduction of transplacental  
103 antibodies and passive immunity for neonates, and the fact that children born after February  
104 2020 will most likely not have been exposed to circulating RSV, thus reducing adaptive  
105 immune response to the virus when encountered. RSV infection is also associated with  
106 recurrent wheeze as a longer-term post infectious morbidity. A higher proportion of children  
107 affected by RSV may increase the subsequent healthcare burden of post infectious wheeze  
108 giving a much longer-term burden on health services.

109

110 The objective of this study is to monitor RSV disease in children under two years of age  
111 attending emergency departments across the UK and Ireland and examine the impact on  
112 timing, age and severity of clinical presentations as NPI restrictions are reduced throughout  
113 the UK and Ireland in 2021.

114

### 115 ***Study Protocol***

116 This protocol is structured in keeping with the principles of the STROBE statement ([strobe-statement.org/](http://strobe-statement.org/)).

117

118 *How the sample is to be selected*

119 A national multi-centre prospective observational cohort study will be carried out through the  
120 PERUKI (Paediatric Emergency Research in the UK and Ireland) Network<sup>13</sup> with forty  
121 departments having committed to participating in the study. All children meeting the  
122 inclusion criteria below will be eligible.

123 *Inclusion criteria*

124 Children under two years of age presenting to participating emergency departments with  
125 clinical features of bronchiolitis (cough, tachypnoea or chest recession, and wheeze or  
126 crackles on chest auscultation)<sup>14</sup> or a first episode of acute viral wheeze.

127 *Exclusion criteria*

128 Children with previous episodes of wheeze responsive to bronchodilator, suggesting an  
129 underlying diagnosis of recurrent wheeze of early childhood.

130 *Data collection*

131 We will collect data at two time points: baseline (date of presentation to a participating ED)  
132 and seven days later.

133 Clinicians identifying a case for inclusion will keep a local log of participants that contain  
134 patient identifiable characteristics cross referenced to a study number. The study number  
135 alone is used in all communication/data entry with the study team. An email after 7 days to  
136 the submitting clinician will prompt data entry at this point.

137 Anonymised data will be entered to a secure online database (REDCap data capture tool)<sup>15,16</sup>  
138 (see below), by clinicians providing acute care within the ED.

139 *Variables to be measured*

140 At baseline, data including patient demographics, presenting characteristics, acuity,  
141 investigations and treatments will be obtained (see Supplementary File 2), as will data on the  
142 number of siblings and travel. An external link will enable clinicians to enter a full postcode  
143 derived index of multiple deprivation score for database entry.

144 At 7 days data will include the child's ultimate outcome (discharged or admitted), highest  
145 acuity dependency (the ward they were placed on if admitted: Normal, High Dependency or

146 Intensive Care), whether care is ongoing, patient was discharged or died and (if obtained)  
147 what viruses were identified by PCR (see Supplementary File 3).

148 RSV status will be identified by either Nasopharyngeal Aspirate (NPA) (a) point of care  
149 testing (rapid viral testing where available) at baseline presentation to ED, or (b) by  
150 laboratory PCR testing, if either is performed as part of standard care.

#### 151 *Sample size calculation*

152 This is a convenience sample cohort study and as such a sample size is not calculated.  
153 However, the most recent bronchiolitis peak in France (epidemiological week 13, to 8 April  
154 2021), involved 2,433 emergency department (ED) attendances and 953 hospital admissions  
155 in children under the age of 2 years, with a total of ~16,000 ED attendances and ~6,000  
156 admissions since the start of 2021.<sup>12</sup> The combined population of the United Kingdom and  
157 Ireland is 72 million, roughly equivalent to that of France (67 million). The PERUKI sites  
158 already enrolled in this study are estimated to provide care for 25 % of the total paediatric  
159 population, and if a similar trend is seen to France we would therefore expect to recruit 4,000  
160 infants and children in the build up to the peak of an RSV epidemic. By site this would be a  
161 mean of ~100 patients over 3 months, or approximately a patient a day per site. Previous  
162 PERUKI surveillance studies have recruited > 1,000 patients in short time scales (1-2  
163 months).

#### 164 *Study registration*

165 The trial will be prospectively registered on ISCRTN Registry (<https://www.isrctn.com/>).

#### 166 *Primary outcomes to be measured, as well as a list of secondary outcomes*

##### 167 *Primary outcome*

168 To report the timing, frequency and clinical severity of RSV infection in children under two  
169 years of age presenting to hospitals in the UK and Ireland.

##### 170 *Secondary outcomes*

- 171 i. To report the excess morbidity of clinical presentations at ED with respiratory disease  
172 by inclusion criteria by month of presentation (compared to published literature/health  
173 data sources).
- 174 ii. To report the geographical timing and spread of RSV infection across the UK.

- 175     iii.    To identify differences in severity of illness and patient population affected by RSV  
176            in relation to typical seasonal ranges in the published literature.
- 177     iv.     To provide data to support and corroborate current RSV surveillance systems (i.e.  
178            Respiratory Datamart [https://www.gov.uk/government/statistics/national-flu-and-](https://www.gov.uk/government/statistics/national-flu-and-covid-19-surveillance-reports)  
179            covid-19-surveillance-reports) and the Emergency Department Syndromic  
180            Surveillance System (EDSSS).  
181            ([https://www.gov.uk/government/publications/emergency-department-](https://www.gov.uk/government/publications/emergency-department-weekly-bulletins-for-2021) weekly-  
182            bulletins-for-2021).
- 183     v.     To provide data to support decision making by government agencies (Joint  
184            Committee on Vaccination and Immunisation) in relation to the prescription of out of  
185            season Palivizumab for high risk children.
- 186     vi.    To provide data to support estimates of potential longer-term impact of changes in  
187            severity of illness and patient populations on health (long term recurrent wheeze) and  
188            associated healthcare resources.

189    *Data analysis and statistical plan*

- 190     i.     Demographics, regional frequencies, incidence estimates and logistic regression will  
191            be performed according to a Statistical Analysis Plan (SAP) in place prior to full data  
192            analysis. This will include:
- 193     ii.    *Descriptive statistics*
- 194            a.    Weekly incidence (broken down nationally and regionally) calculated for  
195                  population at risk for each Emergency Department.
- 196            b.    Median age, co-morbidities, index of multiple deprivation, presenting features  
197                  of recruited patients, compared to previous population studies to identify if  
198                  similar age, spectrum of co-morbidities and presenting clinical features to  
199                  previous epidemics.
- 200            c.    Proportion of RSV vs non-RSV of those tested.
- 201     iii.   *Identification of risk factors for severe disease*
- 202            a.    A number of metrics will be examined as proxy measures for severity  
203                  including:
- 204                  i.    Median saturations in air at presentation and frequency of attendance  
205                        with SpO<sub>2</sub> <94% or <92% in room air.
- 206                  ii.   Median respiratory rate (with reference to age as per Paediatric Early  
207                        Warning Score) at presentation.<sup>17</sup>

- 208                   iii. Blood gas composition (median H<sup>+</sup> and pCO<sub>2</sub> measurements) at  
209                   presentation.
- 210                   iv. Proportion of children admitted to hospital and of those the proportion  
211                   admitted to standard care / HDU / PICU.
- 212                   v. Proportion of children requiring respiratory support (supplementary  
213                   oxygen, high flow oxygen, CPAP, BiPAP or invasive ventilation).
- 214                   vi. Length of stay.
- 215           b. Multivariate logistic regression analyses using random effects model  
216           (recruiting site, availability of on-site PICU facility) to examine risk factors  
217           for hospitalisation, level of ventilatory support and PICU admission. Risk  
218           factors will be compared to predictors of severe disease published in  
219           population studies previously.
- 220    iv.   *Spatio-temporal dynamics of the 2021 epidemic*
- 221           a. Travel histories will be used to identify whether RSV is seeded into  
222           community in a number of separate introduction events, or spreads locally.

223    *Details of any ethical issues relating to the study (and of the ethical approval received)*

224    This prospective observational surveillance study needs to be able to rapidly collate data that  
225    will enable other researchers and health services to make informed decisions about the extent  
226    of any RSV surge. For this reason, and the fact that the data being obtained is already  
227    obtained as part of the clinical record, we will not be asking for consent from families and  
228    carers. The clinician will only enter data regarding the outcomes of the child and no  
229    identifying information will be recorded. The patient's study number will be linked to the  
230    local hospital number to allow outcome data to be retrieved. This information will be held by  
231    the recruiting site only in secure research lockers in each Emergency Department and only  
232    available to appropriately trained staff or research nurses.

233    None of the data recorded centrally by the study team will mean the patient is identifiable,  
234    and there are no specific details recorded that would make it possible to determine any  
235    individual child by proxy. This approach has been successfully adopted in other rapidly  
236    deployed studies the authors have been involved in. The security of the REDCap system we  
237    are using to collate data will add additional data protection safeguards.

238    The study will be submitted for Integrated Research Application System (IRAS) approval  
239    with University Hospitals of Leicester NHS Trust as the Study Sponsor, IRAS ID 297802.



240 *Data input, storage and management*

241 Anonymised data will be entered using the validated online data entry software REDCap.  
242 (Research Electronic Data Capture tools) following the clinical report forms provided in the  
243 appendix (Supplementary Files 2 and 3). This software (REDCap) is hosted on the University  
244 Hospitals Bristol and Weston NHS Foundation Trust (UHBW) secure server, accessible on  
245 the Health and Social Care Network (HSCN) that is managed by NHS Digital. All research  
246 data reside within the hosting institution, and there will be a data transfer agreement made  
247 between University Hospitals of Leicester NHS Trust, Edinburgh University and University  
248 Hospitals Bristol and Weston NHS Foundation Trust in order to allow transfer of data on  
249 completion of data entry and cleaning. Processing of data will be undertaken on instruction of  
250 the Data Controller. The study Sponsor organisation (University Hospitals of Leicester NHS  
251 Trust) will be the Data Controller throughout, and University Hospitals Bristol and Weston  
252 NHS Foundation Trust will have Joint Controllership for the duration of data entry and  
253 cleaning. REDCap uses a granular security model so that users can only review the data they  
254 have been explicitly authorised to access. REDCap also provides a comprehensive log/audit  
255 feature that records all individual changes with a date/time stamp and a change owner. Data  
256 that are captured and stored will only be available via the information technology systems  
257 linked to the HSCN which is the current validated system used by NHS Trusts to share and  
258 store patient information.

259

260 *Plans for dissemination of the study outcome (including the associated data) once completed.*

261 Data will be presented in:

- 262 i. Data submissions to the regulatory authorities and local study teams, including an  
263 interactive online dashboard.
- 264 ii. Conference presentations.
- 265 iii. Peer reviewed scientific journals.
- 266 iv. Collaboration with educational websites with international social media reach  
267 ([www.dontforgetthebubbles.com](http://www.dontforgetthebubbles.com)).
- 268 v. Engagement with the RSV patient network, part of the RESCEU Consortium  
269 (<http://resc-eu.org/>).

270 *Conclusions*

271 There is an urgent need to better understand the effects of non-pharmaceutical interventions  
272 on the transmission and disease dynamics of Respiratory Syncytial Virus, a major cause of  
273 morbidity in infants in the United Kingdom. BronchStart is a multi-centre observational study  
274 embedded within the PERUKI network which will inform the immediate clinical response to  
275 a delayed RSV peak, improve our understanding of how RSV is seeded and spreads within  
276 the United Kingdom, and inform the implementation of future RSV immunisation campaigns.

#### 277 **Ethics policies**

278 The study protocol has been submitted to Integrated Research Application System; in view of  
279 the urgency needed to take this project forward, and the fact that no patient identifiable  
280 information will be collected, we believe it to be exempt from Research Ethics Committee  
281 (REC) Review. This is also in keeping with the Control of Patient Information Notice  
282 (Covid-19 – Notice under Regulation 3(4) of the Health Service Control of Patient  
283 Information Regulations 2002) last reviewed 3rd February 2021.

#### 284 **Data availability**

285 As this is a study protocol no data are yet available. Once available, anonymised, non-patient  
286 identifiable data will be stored on a RedCap server hosted by University of West of England,  
287 Bristol, United Kingdom (See Data input, storage and management).

#### 288 **Author contributions**

289 Williams TC: Conceptualization, Methodology, Writing – Original Draft Preparation,  
290 Writing – Review & Editing

291 Lyttle MD: Conceptualization, Methodology, Project Administration, Software, Writing –  
292 Original Draft Preparation, Writing – Review & Editing

293 Cunningham S: Conceptualization, Methodology, Project Administration, Writing – Original  
294 Draft Preparation, Writing – Review & Editing

295 Sinha I: Conceptualization, Methodology, Writing – Original Draft Preparation, Writing –  
296 Review & Editing

297 Swann O: Conceptualization, Methodology, Writing – Original Draft Preparation, Writing –  
298 Review & Editing

299 Maxwell-Hodkinson A : Conceptualization, Methodology, Writing – Review & Editing

300 Roland D: Conceptualization, Methodology, Project Administration, Writing – Original Draft  
301 Preparation, Writing – Review & Editing

302 PERUKI Site Leads: Conceptualization, Writing – Review & Editing

303

#### 304 **Competing Interests**

305 No competing interests were disclosed.

#### 306 **Grant Information**

307 Dr. Williams is the recipient of a Wellcome Trust Award [204802/Z/16/Z].

#### 308 **Acknowledgements**

309 The authors would like to thank Mai Bacquedano for technical support in the launch of the  
310 REDCap survey tool and ongoing data management.

#### 311 **Supplementary material**

312 Supplementary File 1 lists the PERUKI investigators who will be coordinating local data  
313 entry.

314 Supplementary File 2 and 3 show the full questionnaires to be completed by  
315 clinicians/researchers, including the logic branching trees for questions asked.

#### 316 **References**

317 1 Lewis KM, De Stavola B, Hardelid P. Geospatial and seasonal variation of  
318 bronchiolitis in England: a cohort study using hospital episode statistics. *Thorax* 2020;  
319 **75**: 262–268.

320 2 Green CA, Yeates D, Goldacre A, *et al.* Admission to hospital for bronchiolitis in  
321 England: Trends over five decades, geographical variation and association with  
322 perinatal characteristics and subsequent asthma. *Arch Dis Child* 2016; **101**: 140–6.

323 3 Britton PN, Hu N, Saravanos G, *et al.* COVID-19 public health measures and  
324 respiratory syncytial virus. *Lancet Child Adolesc Heal* 2020; **4**: e42–3.

325 4 Huang QS, Wood T, Jelley L, *et al.* Impact of the COVID-19 nonpharmaceutical  
326 interventions on influenza and other respiratory viral infections in New Zealand. *Nat*

- 327            *Commun* 2021; **12**: 1–7.
- 328    5        Olsen SJ, Azziz-Baumgartner E, Budd AP, *et al.* Decreased Influenza Activity During  
329        the COVID-19 Pandemic — United States, Australia, Chile, and South Africa, 2020.  
330        *MMWR Morb Mortal Wkly Rep* 2020; **69**: 1305–9.
- 331    6        Vásquez-Hoyos P, Diaz-Rubio F, Monteverde-Fernandez N, *et al.* Reduced PICU  
332        respiratory admissions during COVID-19. *Arch Dis Child* 2020; **0**: archdischild-2020-  
333        320469.
- 334    7        Williams TC, MacRae C, Swann O V, *et al.* Indirect effects of the COVID-19  
335        pandemic on paediatric healthcare use and severe disease: a retrospective national  
336        cohort study. *Arch Dis Child* 2021; **0**: archdischild-2020-321008.
- 337    8        Public Health England. Weekly national Influenza and COVID-19 surveillance report.  
338        2021; published online May 15.  
339        [https://assets.publishing.service.gov.uk/government/uploads/system/uploads/attachmen](https://assets.publishing.service.gov.uk/government/uploads/system/uploads/attachment_data/file/978131/Weekly_Flu_and_COVID-19_report_w15.pdf)  
340        [t\\_data/file/978131/Weekly\\_Flu\\_and\\_COVID-19\\_report\\_w15.pdf](https://assets.publishing.service.gov.uk/government/uploads/system/uploads/attachment_data/file/978131/Weekly_Flu_and_COVID-19_report_w15.pdf) (accessed April 16,  
341        2021).
- 342    9        Nicolaidis Pathology S. Respiratory Virus Report 2020. 2020.
- 343    10       Baker RE, Park SW, Yang W, Vecchi GA, Metcalf CJE, Grenfell BT. The impact of  
344        COVID-19 nonpharmaceutical interventions on the future dynamics of endemic  
345        infections. *Proc Natl Acad Sci* 2020; **117**: 30547–53.
- 346    11       Foley DA, Yeoh DK, Minney-Smith CA, *et al.* The Interseasonal Resurgence of  
347        Respiratory Syncytial Virus in Australian Children Following the Reduction of  
348        Coronavirus Disease 2019–Related Public Health Measures. *Clin Infect Dis* 2021;  
349        published online Feb 17. DOI:10.1093/cid/ciaa1906.
- 350    12       Sante Publique France. Bulletin épidémiologique bronchiolite, semaine 14. Saison  
351        2020-2021. 2021. [https://www.santepubliquefrance.fr/maladies-et-](https://www.santepubliquefrance.fr/maladies-et-traumatismes/maladies-et-infections-respiratoires/bronchiolite/documents/bulletin-national/bulletin-epidemiologique-bronchiolite-semaine-14.-saison-2020-2021)  
352        [traumatismes/maladies-et-infections-respiratoires/bronchiolite/documents/bulletin-](https://www.santepubliquefrance.fr/maladies-et-infections-respiratoires/bronchiolite/documents/bulletin-national/bulletin-epidemiologique-bronchiolite-semaine-14.-saison-2020-2021)  
353        [national/bulletin-epidemiologique-bronchiolite-semaine-14.-saison-2020-2021](https://www.santepubliquefrance.fr/maladies-et-infections-respiratoires/bronchiolite/documents/bulletin-national/bulletin-epidemiologique-bronchiolite-semaine-14.-saison-2020-2021)  
354        (accessed April 16, 2021).
- 355    13       Lyttle MD, O’Sullivan R, Hartshorn S, Bevan C, Cleugh F, Maconochie I. Pediatric  
356        Emergency Research in the UK and Ireland (PERUKI): Developing a collaborative for

- 357 multicentre research. *Arch Dis Child* 2014; **99**: 602–3.
- 358 14 NICE. 1 Recommendations | Bronchiolitis in children: diagnosis and management |  
359 Guidance | NICE. [https://www.nice.org.uk/guidance/ng9/chapter/1-](https://www.nice.org.uk/guidance/ng9/chapter/1-Recommendations#assessment-and-diagnosis)  
360 [Recommendations#assessment-and-diagnosis](https://www.nice.org.uk/guidance/ng9/chapter/1-Recommendations#assessment-and-diagnosis) (accessed April 2, 2021).
- 361 15 Harris PA, Taylor R, Minor BL, *et al.* The REDCap consortium: Building an  
362 international community of software platform partners. *J Biomed Inform* 2019; **95**.  
363 DOI:10.1016/j.jbi.2019.103208.
- 364 16 Harris PA, Taylor R, Thielke R, Payne J, Gonzalez N, Conde JG. Research electronic  
365 data capture (REDCap)-A metadata-driven methodology and workflow process for  
366 providing translational research informatics support. *J Biomed Inform* 2009; **42**: 377–  
367 81.
- 368 17 PEWS. [https://ihub.scot/improvement-programmes/scottish-patient-safety-programme-](https://ihub.scot/improvement-programmes/scottish-patient-safety-programme-spsp/spsp-programmes-of-work/maternity-and-children-quality-improvement-collaborative-mcqc/paediatric-care/pews/)  
369 [spsp/spsp-programmes-of-work/maternity-and-children-quality-improvement-](https://ihub.scot/improvement-programmes/scottish-patient-safety-programme-spsp/spsp-programmes-of-work/maternity-and-children-quality-improvement-collaborative-mcqc/paediatric-care/pews/)  
370 [collaborative-mcqc/paediatric-care/pews/](https://ihub.scot/improvement-programmes/scottish-patient-safety-programme-spsp/spsp-programmes-of-work/maternity-and-children-quality-improvement-collaborative-mcqc/paediatric-care/pews/) (accessed April 14, 2021).
